# Supplementary material for: Natural Bioactives: Back to the Future in the Fight against Human Papillomavirus? A Narrative Review
Source: MDPI journal article supplement (doi:10.3390/jcm11051465), 2022-03-07
Supplement: s1 [file s1]

**Table S1.** Summary of plant-derived formulations that have been utilized in clinical trials against HPV, listed in chronological order, by chemical group association.

| Indole-3-carbinol-based formulations | Text Reference<br>Number/Composition                                                                  | Administration                                                                                                                                                                                                                            | Type of Study                                                                               | Outcome                                                                                                                                                                                                                                                                                                                                                                                                                                                    | Bibliography<br>Ref./Year/Country |
|--------------------------------------|-------------------------------------------------------------------------------------------------------|-------------------------------------------------------------------------------------------------------------------------------------------------------------------------------------------------------------------------------------------|---------------------------------------------------------------------------------------------|------------------------------------------------------------------------------------------------------------------------------------------------------------------------------------------------------------------------------------------------------------------------------------------------------------------------------------------------------------------------------------------------------------------------------------------------------------|-----------------------------------|
|                                      | <b>No.1</b><br><b>Indole-3-carbinol</b><br>(I-3-C; Theranaturals, Inc.,<br>Orem, Utah)                | <ul style="list-style-type: none"> <li>Adults: 200 mg I-3-C / orally/ twice daily</li> <li>Children: 10 mg I-3-C / kg / orally / twice daily</li> </ul>                                                                                   | Phase I trial<br>(N= 18 patients with recurrent respiratory papillomatosis)                 | <p>On average follow-up of 14.6 months:</p> <ul style="list-style-type: none"> <li>Cessation of papilloma growth and no surgery in 33 % (6 out of 18) on I3C</li> <li>reduced papilloma growth rate in 33 % (6 out of 18) on I3C</li> <li>no clinical response to I3C in 33 % (6 out of 18) on I3C</li> <li>Correlation of ratio of hydroxylation of estradiol by I3C and clinical response.</li> <li>Safe and well tolerated also in children.</li> </ul> | [123]<br>1998<br>USA              |
|                                      | <b>No.2</b><br><b>Indole-3-carbinol (I-3-C)</b>                                                       | <ul style="list-style-type: none"> <li>Group 1 (n = 9): I-3-C 200 mg / orally / daily/ 12 weeks</li> <li>Group 2 (n= 8): I-3-C 400 mg / orally / daily/ 12 weeks</li> <li>Group 3 (n = 10): placebo / orally / daily/ 12 weeks</li> </ul> | Placebo-Controlled Trial<br>(N= 27 patients with histologically confirmed CIN II – CIN III) | <ul style="list-style-type: none"> <li>Statistically significant complete regression in 4 out of 8 patients on I-3-C 200 mg/day and in 4 out of 9 patients on I-3-C 400 mg/day, compared with placebo.</li> <li>HPV clearance in 7 of 8 on 200 mg/day, and in 8 out of 9 on 400 mg/day (in 7 out of 10 on placebo)</li> <li>Change of the 2/16a-hydroxyestrone ratio.</li> </ul>                                                                           | [124]<br>2000<br>USA              |
|                                      | <b>No.3</b><br><b>Indole-3-carbinol</b><br>(I-3-C; supplied by<br>Theranaturals, Inc., Orem,<br>Utah) | <ul style="list-style-type: none"> <li>Adults: 200 mg I-3-C / orally/ twice daily</li> <li>Children: 10 mg I-3-C / kg / orally / twice daily</li> </ul>                                                                                   | Prospective, open-label<br>clinical trial<br>(N= 33 patients with recurrent papillomatosis) | <p>On average follow-up of 4.8 years:</p> <ul style="list-style-type: none"> <li>Remission of papillomatous growth and no surgery in 11 (33%) patients on I3C.</li> <li>Reduction in papillomatous growth and less frequent surgery in 10 (30%) patients on I3C.</li> </ul>                                                                                                                                                                                | [125]<br>2004<br>USA              |

|                                                                                                                                                             |                                                                                                                                                                        |                                                                                                                |                                                                                                                                                                                                                                                                                                                                                                                                                                       |                         |
|-------------------------------------------------------------------------------------------------------------------------------------------------------------|------------------------------------------------------------------------------------------------------------------------------------------------------------------------|----------------------------------------------------------------------------------------------------------------|---------------------------------------------------------------------------------------------------------------------------------------------------------------------------------------------------------------------------------------------------------------------------------------------------------------------------------------------------------------------------------------------------------------------------------------|-------------------------|
|                                                                                                                                                             |                                                                                                                                                                        |                                                                                                                | <ul style="list-style-type: none"> <li>No clinical response in 12 (36%) patients on I3C.</li> </ul>                                                                                                                                                                                                                                                                                                                                   |                         |
|                                                                                                                                                             |                                                                                                                                                                        |                                                                                                                | No statistical difference between treatment and placebo                                                                                                                                                                                                                                                                                                                                                                               |                         |
|                                                                                                                                                             |                                                                                                                                                                        |                                                                                                                | <ul style="list-style-type: none"> <li>CIN decreased by 1–2 grades or to normal in 47% (21 subjects) on DIM</li> <li>Improved Pap smear in 49% (22/45) on DIM</li> <li>Improved colposcopy in 56% (25 subjects) on DIM.</li> <li>Complete colposcopic response in 9% (4 subjects) on DIM.</li> <li>Stratification by level of dysplasia, age, race, HPV status, tobacco use, contraceptive used did not alter the results.</li> </ul> | [126]<br>2010<br>USA    |
| <b>No.4</b><br><b>Diindolylmethane (DIM)</b><br><b>dietary supplement</b><br>(DIM®, stable form of Indole-3-carbinol, supplied by BioResponse, Boulder, CO) | <ul style="list-style-type: none"> <li>Group 1 (n = 45): DIM 2 mg/kg/day / orally / 12 weeks</li> <li>Group 2 (n = 19): placebo / orally / daily / 12 weeks</li> </ul> | Randomized double blind placebo controlled phase III trial (N= 64 patients with CIN II or CIN III)             |                                                                                                                                                                                                                                                                                                                                                                                                                                       |                         |
|                                                                                                                                                             |                                                                                                                                                                        |                                                                                                                | No systemic toxicities                                                                                                                                                                                                                                                                                                                                                                                                                |                         |
|                                                                                                                                                             |                                                                                                                                                                        |                                                                                                                | DIM oral supplementation had no statistically relevant effect on cytology or infection compared to placebo:                                                                                                                                                                                                                                                                                                                           |                         |
|                                                                                                                                                             |                                                                                                                                                                        |                                                                                                                | <ul style="list-style-type: none"> <li>Development of CIN2 or worse in 9% on DIM and 12% on placebo (risk ratio (RR) 0.7).</li> <li>Development of CIN3 or worse (RR 0.9) in 4.6% on DIM and 5.1% on placebo</li> <li>No sign of disease in 27.3% on DIM and 34.3% on placebo at 6 months (RR 0.8).</li> </ul>                                                                                                                        | [127]<br>2012<br>UK     |
|                                                                                                                                                             |                                                                                                                                                                        |                                                                                                                | Supplementation was well tolerated                                                                                                                                                                                                                                                                                                                                                                                                    |                         |
| <b>No.6</b><br><b>Diindolylmethane (DIM)</b><br><b>intravaginal suppository</b>                                                                             | <ul style="list-style-type: none"> <li>Group 1 (n = 26): DIM 200 mg (2 suppositories) / intravaginally / daily/ 180 days</li> </ul>                                    | Double-blind randomized placebo controlled multicenter clinical trial phase IIa (N= 78 patients with CIN I-II) | <ul style="list-style-type: none"> <li>Statistically relevant CIN regression in 90,5 % (19 out of 21) and 100% (19 out of 19) of patients after 90–180 days of treatment with 100 and 200 mg/day, respectively.</li> </ul>                                                                                                                                                                                                            | [128]<br>2015<br>RUSSIA |

|                             |                                                                                                                                                          |                                                                                                                                                                                                                                                                                                                                                    |                                                                                                                                                                            |                                                                                                                                                                                                                                                                            |                                                                                                                                                                                                                                                                                    |
|-----------------------------|----------------------------------------------------------------------------------------------------------------------------------------------------------|----------------------------------------------------------------------------------------------------------------------------------------------------------------------------------------------------------------------------------------------------------------------------------------------------------------------------------------------------|----------------------------------------------------------------------------------------------------------------------------------------------------------------------------|----------------------------------------------------------------------------------------------------------------------------------------------------------------------------------------------------------------------------------------------------------------------------|------------------------------------------------------------------------------------------------------------------------------------------------------------------------------------------------------------------------------------------------------------------------------------|
| Curcumin-based formulations |                                                                                                                                                          | <ul style="list-style-type: none"><li>Group 2 (n = 26): DIM 100 mg (1 suppository) / intravaginally / daily/ 180 days</li><li>Group 3 (n = 26) placebo (one suppository) / intravaginally / daily/ 180 days</li></ul>                                                                                                                              |                                                                                                                                                                            | <ul style="list-style-type: none"><li>Moderate AEs registered in 40.0 % of patients (10 of 25 subjects, CI 95 %:21.1–61.3 %) on DIM 100 mg/day</li><li>Moderate AEs registered in 42.0 % of patients (10 of 24 subjects, CI 95 %: 22.1–63.4 %) on DIM 200 mg/day</li></ul> |                                                                                                                                                                                                                                                                                    |
|                             | No.1<br>Curcumin<br>(99,3 % pure diferuloylmethane)                                                                                                      | <ul style="list-style-type: none"><li>Group 1: curcumin 500 mg / orally / day / 3 months</li><li>Group 2: curcumin 1000 mg / orally / day / 3 months</li><li>Group 3: curcumin 2000 mg / orally / day / 3 months</li><li>Group 4: curcumin 4000 mg / orally / day / 3 months</li><li>Group 5: curcumin 8000 mg / orally / day / 3 months</li></ul> | Phase I Clinical trial<br>(N= 4 patients with CIN)                                                                                                                         | <ul style="list-style-type: none"><li>CIN normalization in 1 out of 4 cases on Curcumin 500 mg</li><li>No toxicity up to 8,000 mg/day/3 months</li></ul>                                                                                                                   | [103]<br>2001<br>CHINA                                                                                                                                                                                                                                                             |
|                             | No.2<br>Basant™<br>cream: <ul style="list-style-type: none"><li>Curcumin (95% pure diferuloyl methane (EE)-1,7-bis(4-hydroxy-3-methoxyphenyl)-</li></ul> | polyherbal                                                                                                                                                                                                                                                                                                                                         | <ul style="list-style-type: none"><li>Group 1: Basant™ cream (5 ml) / intavaginal / day / 30 days</li><li>Group 2: placebo cream) / intravaginal / day / 30 days</li></ul> | Placebo-controlled Phase II Randomized Study (N= 280 HPV-positive women without high grade cervical neoplasia)                                                                                                                                                             | Basant™: <ul style="list-style-type: none"><li>HPV clearance in 87.7% of patients (not statistically significant compared to placebo) in early stages LSIL. Statistically significant when HPV clearance was compared to the two placebo arms (cream and capsule; N=128)</li></ul> |

- |                                                                                                                                                                                                                                                         |                                                                                                                                                                                                             |                                                                                                                                                   |
|---------------------------------------------------------------------------------------------------------------------------------------------------------------------------------------------------------------------------------------------------------|-------------------------------------------------------------------------------------------------------------------------------------------------------------------------------------------------------------|---------------------------------------------------------------------------------------------------------------------------------------------------|
| <ul style="list-style-type: none"> <li>1,6-heptadiene-3,5-dione)</li> <li>• purified extracts of <i>Emblica officinalis</i> and of <i>Aloe barbadensis</i></li> <li>• purified saponins from <i>Sapindus mukorossi</i></li> <li>• Rose water</li> </ul> | <ul style="list-style-type: none"> <li>• Group 3: 500 mg curcumin (1 gelatine capsule) / intravaginal / day / 30 days</li> <li>• Group 4: placebo gelatine capsule / intravaginal / day / 30 day</li> </ul> | <ul style="list-style-type: none"> <li>• 38 days median duration of HPV clearance</li> <li>• AEs: Mild to moderate vaginal irritation.</li> </ul> |
|---------------------------------------------------------------------------------------------------------------------------------------------------------------------------------------------------------------------------------------------------------|-------------------------------------------------------------------------------------------------------------------------------------------------------------------------------------------------------------|---------------------------------------------------------------------------------------------------------------------------------------------------|

Curcumin:

- HPV clearance (81.3%, not statistically significant compared to placebo).
- 39 day median duration of HPV clearance

**Curcumin soft gelatine capsules**

**No.3**

**Basant™ intravaginal capsules:**

- |                                                                                                                                                                                                                                                                                                                                                                                               |                                                                                                                                                                                     |                                                                                                                      |                                                                                                                                                                                                   |
|-----------------------------------------------------------------------------------------------------------------------------------------------------------------------------------------------------------------------------------------------------------------------------------------------------------------------------------------------------------------------------------------------|-------------------------------------------------------------------------------------------------------------------------------------------------------------------------------------|----------------------------------------------------------------------------------------------------------------------|---------------------------------------------------------------------------------------------------------------------------------------------------------------------------------------------------|
| <ul style="list-style-type: none"> <li>• Curcumin (95% pure diferuloyl methane (E,E)-1,7-bis(4-hydroxy-3-methoxyphenyl)-1,6-heptadiene-3,5-dione)</li> <li>• purified extracts of <i>Emblica officinalis</i>, <i>Azadirachta indica</i> leaves, <i>Aloe barbadensis</i></li> <li>• Excipients: citric acid, sorbitol, microcrystalline cellulose, sodium starchglycolate, starlac,</li> </ul> | <ul style="list-style-type: none"> <li>• Group 1: 2 capsules (250 mg each) / intravaginally / day / 30 days</li> <li>• Group 2: Placebo / intravaginally / day / 30 days</li> </ul> | <p>Placebo-controlled Phase I Clinical Trial (N=11 HPV 16-positive women, without high grade cervical neoplasia)</p> | <ul style="list-style-type: none"> <li>• HPV clearance in 100% on Basant™</li> <li>• Normal or improved Pap smear in 1 out of 11 and 10 out of 11 on Basant™ and Placebo, respectively</li> </ul> |
|-----------------------------------------------------------------------------------------------------------------------------------------------------------------------------------------------------------------------------------------------------------------------------------------------------------------------------------------------------------------------------------------------|-------------------------------------------------------------------------------------------------------------------------------------------------------------------------------------|----------------------------------------------------------------------------------------------------------------------|---------------------------------------------------------------------------------------------------------------------------------------------------------------------------------------------------|

[156]  
2015  
INDIA



|                                     |                                                                                                                                                                                                                                                                                                                                                                                                                                                                     |                                                                                                                                                                       |                                                                                                                                                                                                                                                                                                                                                                                                                                                                                                       |                                 |
|-------------------------------------|---------------------------------------------------------------------------------------------------------------------------------------------------------------------------------------------------------------------------------------------------------------------------------------------------------------------------------------------------------------------------------------------------------------------------------------------------------------------|-----------------------------------------------------------------------------------------------------------------------------------------------------------------------|-------------------------------------------------------------------------------------------------------------------------------------------------------------------------------------------------------------------------------------------------------------------------------------------------------------------------------------------------------------------------------------------------------------------------------------------------------------------------------------------------------|---------------------------------|
|                                     | <ul style="list-style-type: none"> <li>with 56–72% as EGCG</li> <li>oral capsules containing 200 mg EGCG / capsule provided by the green tea producing Mitsui Norin Co. Ltd.</li> </ul>                                                                                                                                                                                                                                                                             | <ul style="list-style-type: none"> <li>Group 2 (n= 48): placebo / daily / oral / 4 months</li> </ul>                                                                  | <ul style="list-style-type: none"> <li>(14.6%) and 3 (7.7%) in the Polyphenon E and placebo arms, respectively.</li> <li>Poly E was acceptable, safe and well tolerated, but AEs more frequent on Poly E</li> </ul>                                                                                                                                                                                                                                                                                   |                                 |
| Other Polyherbal-based formulations | <p><b>No.1</b><br/><b>Praneem polyherbal</b> (500 mg):</p> <ul style="list-style-type: none"> <li>purified leaf extract of <i>Azadirachta indica</i>, 80 mg;</li> <li>purified saponins from <i>Sapindus muckerossi</i>, 40 mg;</li> <li><i>Mentha citrate</i> oil, 20 mg;</li> <li>Quinine Hydrochloride 30 mg;</li> <li>Excipients: citric acid, sorbitol, microcrystalline cellulose, sodium starchglycolate, starlac, crospovidones, sodium alginate</li> </ul> | <ul style="list-style-type: none"> <li>Group 1 (n= 10): Praneem 500 mg (1 tablet) / daily / intra-vaginally / 30-60 days</li> <li>Group 2 (n= 10): Placebo</li> </ul> | <p>Open-label, placebo-controlled clinical trial (N= 20 HPV 16 positive patients, with or without LSIL)</p> <ul style="list-style-type: none"> <li>Clearance of HPV 16 in 60% on Praneem for 30 days</li> <li>Clearance of HPV 16 in 20% on Praneem for 60 days</li> <li>Overall clearance rate (80%) statistically significant compared to 10% spontaneous clearance rate on placebo</li> <li>.Marked improvement of clinical symptoms and cytological abnormalities in cleared patients.</li> </ul> | <p>[157]<br/>2009<br/>INDIA</p> |

**Table S2.** Summary of phytochemicals that have been screened against HPV listed in alphabetical order within the different chemical groups (↑: upregulation/induction/increase; ↓: downregulation/reduction/decrease).

| Compound                                                  | Dietary Sources                                                                                                                                         |          | Model                                                  | IC50            | Mechanism of Action                                                                                                                                                                                                                                                                                                                      | References |
|-----------------------------------------------------------|---------------------------------------------------------------------------------------------------------------------------------------------------------|----------|--------------------------------------------------------|-----------------|------------------------------------------------------------------------------------------------------------------------------------------------------------------------------------------------------------------------------------------------------------------------------------------------------------------------------------------|------------|
| Apigenin<br>(Polyphenols,<br>Flavonoids,<br>Flavones)     | Onion, parsley, oranges, tea, wheat sprouts, chamomile, Chinese cabbage, bell pepper, garlic, bilimbi fruit, guava, wolfberry leaves                    | In vitro | CaSki, HeLa, C33A                                      | 10 – 76 – 40 μM | ↑ G1 phase growth arrest, p53, Apoptosis, p21/WAF1, Fas/APO-1 and caspase-3.<br>↓ Proliferation, traslocation, Bcl-2<br>Modification of cell motility (nterference with gap junctions)                                                                                                                                                   | [55–57]    |
| Baicalein<br>(Polyphenols,<br>Flavonoids,<br>Flavones)    | Dry root of <i>Scutellaria baicalensis</i>                                                                                                              | In vitro | HeLa, SiHa, C33A                                       | -               | ↓ Colony-forming capacity, Invasion, p21/p27, Hedgehog/Gli signaling pathway, NF-κB pathway, TGFβ pathway, Proliferation, mTOR/p70S6K signal pathway, AKT/mTOR signal pathway, Notch-1/Hes-1 (Hes-5), Cell migration, miR-19a-3p<br>↑ CyclinD1, Cell cycle arrest at G0/G1, Apoptosis, Bax/Bcl-2 ratio, Fas, FasL, Caspase-8, E-cadherin | [195–198]  |
|                                                           |                                                                                                                                                         | In vivo  | Nude mice (with cervical cancer xenograft)             | -               | ↓ Long non-coding RNA                                                                                                                                                                                                                                                                                                                    |            |
|                                                           |                                                                                                                                                         |          | Kun Ming mice with mouse U14 cervical cancer cell line | -               | ↓ Tumor weight<br>↑ Thymus weight and spleen weight, Bax/Bcl-2 ratio                                                                                                                                                                                                                                                                     |            |
| Butein<br>(Polyphenols,<br>Chalcones)                     | <i>Toxicodendron vernicifluum</i> , <i>Semecarpus anacardium</i> , <i>Dalbergia odorifera</i> , <i>Caragana jubata</i> , and <i>Rhusverniciflua</i> sp. | In vitro | HeLa, MCF-7, ME-180, SiHa, C33A                        | -               | Possible gene regulatory role                                                                                                                                                                                                                                                                                                            | [199–201]  |
|                                                           |                                                                                                                                                         | In vivo  | HeLa xenograft mouse                                   | -               |                                                                                                                                                                                                                                                                                                                                          |            |
| Caffeic Acid<br>(Polyphenols,<br>Hydroxycinnamic acids)   | Coffee, fruits, vegetables, and olive oil                                                                                                               | In vitro | HeLa, ME-180                                           | -               | ↓ Mitochondrial membrane potential<br>↑ S and G2/M growth arrest, lipid peroxidative markers (thio-barbituric acid reactive substances, conjugated dienes, and lipid hydroperoxide), ROS, apoptotic morphological changes and cancer cell death by binding to HDAC                                                                       | [35,36]    |
| Calycosin<br>(Polyphenols,<br>Flavonoids,<br>Isoflavones) | Radix astragali                                                                                                                                         | In vitro | HeLa, CaSki, SiHa, C33A                                | -               | ↓ Invasion, miR-375, Cell viability, Apoptosis                                                                                                                                                                                                                                                                                           | [202]      |
| Chrysin<br>(Polyphenols,<br>Flavonoids,<br>Flavones)      | <i>Scutellaria discolor</i> , passion flower, <i>Passiflora</i> spp., propolis, honey, mushroom, honeycomb                                              | In vitro | HeLa                                                   | 14.2 μM         | ↓ Akt signaling, Proliferation<br>↑ Apoptosis, Caspases, p38, NFκB/p65, Cell cycle arrest                                                                                                                                                                                                                                                | [203,204]  |

| Compound                                                                          | Dietary Sources                                                  |                      | Model                                                                        | IC50               | Mechanism of Action                                                                                                                                                                                                                                                                                                                                                                                                                                       | References       |
|-----------------------------------------------------------------------------------|------------------------------------------------------------------|----------------------|------------------------------------------------------------------------------|--------------------|-----------------------------------------------------------------------------------------------------------------------------------------------------------------------------------------------------------------------------------------------------------------------------------------------------------------------------------------------------------------------------------------------------------------------------------------------------------|------------------|
| Curcumin and MS17 curcumin analogue 1,5-Bis(2-hydroxyphenyl)-1,4-pentadiene-3-one | Rhizome of the medicinal plant turmeric ( <i>Curcuma longa</i> ) | In vitro             | SiHa, CaSki, HeLa, C33A                                                      | -                  | ↓ HPV-18 transcription by selectively AP-1, which reverses the expression dynamics of c-fos and fra-1, Telomerase activity, Ras, ERK signaling pathways, Cyclin D1, COX-2, iNOS activity, Mitochondrial pathway, HPV E6 and E7 oncoproteins, NF-kB, Bcl-2, Bcl-XL<br>↑ Apoptosis through caspase-3; p21, ROS, Bax, AIF, release of cytochrome c, p53 (when in association with ellagic acid)<br>↑ sensitivity to vinblastine, mitoxantrone, and etoposide | [95–101,103,104] |
|                                                                                   |                                                                  | In vivo              | phase I clinical trial                                                       | -                  | Histological improvements in 1 out of 4 cases.                                                                                                                                                                                                                                                                                                                                                                                                            |                  |
| Cyanidin (Polyphenols, Flavonoids, Anthocyanidins)                                | Berries, red fruits, black rice, some cereals, root vegetables   | In vitro             | HeLa                                                                         | 85.95–408.13 µg/mL | ↓ Proliferation<br>↑ Dose- and time-dependent apoptosis through Bax/Bcl-2, ROS, Peroxides                                                                                                                                                                                                                                                                                                                                                                 | [85,205]         |
| Daidzein (Polyphenols, Flavonoids, Flavones)                                      | Soy                                                              | In vitro             | HeLa                                                                         | -                  | ↑ Human telomerase catalytic subunit mRNA decreased, Cell growth arrest, Cell cycle arrest, Telomerase activity                                                                                                                                                                                                                                                                                                                                           | [78]             |
| Decursin and Decursinol (Polyphenols, Pyranocoumarin compounds)                   | Roots of <i>Angelica gigas</i>                                   | In vitro             | Hela                                                                         | 5-10 µg/mL         | ↓ HPV E6 and E7 expression<br>↑ Apoptosis (TRAIL expression)                                                                                                                                                                                                                                                                                                                                                                                              | [135]            |
| EGCG (Polyphenols, Catechins)                                                     | Green tea                                                        | In vivo              | Clinical trial                                                               | -                  | Controls and promotes IL-23-dependent DNA repair<br>Modulates growth factor-mediated pathway, the mitogen-activated protein kinase-dependent pathway, and ubiquitin/proteasome degradation pathways<br>↓ Carcinogenic signal transduction pathways<br>↑ Cytotoxic T-cell activities                                                                                                                                                                       | [64–70]          |
|                                                                                   |                                                                  | In vitro and in vivo | CaSki                                                                        | -                  | ↓ Proliferation<br>↑ Dose-dependent apoptosis<br>Arrest of cell cycle in the G1 phase.                                                                                                                                                                                                                                                                                                                                                                    |                  |
|                                                                                   |                                                                  | In vitro             | CaSki, HeLa, C33A, TCL-1 (HPV-immortalized cervical epithelial cells), Me180 | -                  | ↑ Apoptosis, p53, Bcl-2 and p21 (dose-dependent)<br>↓ Proliferation (time- and dose- dependent, via regulating the expression of miRNAs), HPV E6/E7 expression, estrogen receptor $\alpha$ , aromatase by a time-dependent manner mediated by                                                                                                                                                                                                             |                  |



| Compound                                                   | Dietary Sources                                                                                                                                                |          | Model                               | IC50                            | Mechanism of Action                                                                                                                                                                              | References |
|------------------------------------------------------------|----------------------------------------------------------------------------------------------------------------------------------------------------------------|----------|-------------------------------------|---------------------------------|--------------------------------------------------------------------------------------------------------------------------------------------------------------------------------------------------|------------|
|                                                            |                                                                                                                                                                |          |                                     |                                 | apoptosis, Hypoxia- and serum-induced HIF-1 $\alpha$ and VEGF (via MAPK and PI3K/AKT pathways)                                                                                                   |            |
| Ellagic acid<br>Polyphenols,<br>Hydroxybenzoic<br>acids)   | Longan ( <i>Dimocarpus longan</i> ), litchi<br>( <i>Litchi chinensis</i> ), walnuts, pecans,<br>cranberries, raspberries,<br>strawberries, grapes, and peaches | In vitro | HeLa, SiHa, C33A                    | < 1 $\mu$ M; 48.7<br>$\mu$ g/ml | ↓ Cell viability, HPV E6 oncoprotein, STAT3 signaling, Cyclin<br>D1, Bcl-x1, Mcl-1, Cell migration, Invasion, AKT/mTOR                                                                           | [37]       |
|                                                            |                                                                                                                                                                | In vivo  | Mice                                | -                               | ↑ Apoptosis, Cell cycle arrest at G1/S/G2, p53, Bax, Caspase3,<br>Caspase9, Cell growth arrest, enhanced expression of IGFBP7                                                                    |            |
| Eupatorin<br>(Polyhenols,<br>Flavonoids,<br>Flavones)      | Orthosiphon stamineus, Lantana<br>montevidensis, and Tanacetum<br>vulgare                                                                                      | In vitro | HeLa, CaSki                         | 100-150 $\mu$ M                 | ↓ Cleaved caspase-3 expression, Proliferation, Hedgehog signal<br>pathway, Angiogenesis<br>↑ Cell cycle arrest at G2/M, Cyclin B1, Cyclin D1, Ki67, p53, p21,<br>Bax, Caspase-mediated apoptosis | [206–209]  |
| Ferulic Acid<br>(Polyphenols,<br>Hydroxycinnamic<br>acids) | Cereal grains, particularly the outer<br>parts of the grain                                                                                                    | In vitro | HeLa, ME-180                        | 10 $\mu$ g/ml                   | ↓ Cell viability, MMP-9 mRNA expression, arrest in G0/G1 phase<br>↑ Efficacy of radiotherapy probably through ROS                                                                                | [38,39]    |
| Fisetin<br>(Polyphenols,<br>Flavonoids,<br>Flavonols)      | Cucumber, onion, persimmon,<br>strawberry, apple                                                                                                               | In vitro | HeLa                                | -                               | ↓ Proliferation, Tumor growth, inhibition of ERK1/2                                                                                                                                              | [72]       |
|                                                            |                                                                                                                                                                | In vivo  | Immunodeficient nude<br>mice        | -                               | ↑ Apoptosis (due to activation of the phosphorylation ERK1/2,<br>inhibition of ERK1/2 by PD98059), Caspase-8-/caspase-3-<br>dependent pathway                                                    |            |
| Galangin<br>(Polyphenols,<br>Flavonoids,<br>Flavonols)     | <i>Alpinia officinarum</i>                                                                                                                                     | In vitro | HeLa                                | 12.5 $\mu$ M                    | ↓ Proliferation, Cell migration, Glyoxalase-1, Nfr-2<br>↑ ROS, Cell death                                                                                                                        | [210,211]  |
| Gallic acid<br>(Polyphenols,<br>Hydroxybenzoic<br>acids)   | Blackberry, raspberry, walnuts,<br>chocolate, wine, green tea, and<br>vinegar                                                                                  | In vitro | HeLa, HTB-35, HUVEC                 | 10-40 $\mu$ M                   | ↓ Cell viability, Proliferation, Invasion, Angiogenesis,<br>Cytotoxicity on normal cells<br>↑ ROS and GSH depletion                                                                              | [40,41]    |
| Genistein<br>(Polyphenols,<br>Isoflavonids)                | Soy, beans, chickpeas, alfalfa, and<br>peanuts                                                                                                                 | In vitro | HeLa, CaSki                         | 100 $\mu$ M                     | ↓ Cell migration by modulating MMP-9 and TIMP-1                                                                                                                                                  | [85–89]    |
|                                                            |                                                                                                                                                                | In vivo  | Agouti mice Sprague-<br>Dawley rats | -                               | ↑ Cell growth arrest, Apoptosis, Cell cycle arrest at G2/M,<br>Activity of cisplatin (a chemotherapeutic agent)                                                                                  |            |
| Hesperetin<br>(Polyphenols,<br>Flavonoids,<br>Flavanones)  | Citrus fruit                                                                                                                                                   | In vitro | SiHa                                | 650 $\mu$ M                     | ↓ Cell viability, Bcl-2<br>↑ Extrinsic and intrinsic apoptosis, Cytochrome c, Cleaved<br>caspase-3, Cleaved caspase-8, Cleaved caspase-9, p53, Bax,<br>FADD, Fas, Cell cycle arrest at G2/M      | [42,43]    |
|                                                            | Citrus fruit                                                                                                                                                   | In vitro | HeLa, SiHa, CaSki,<br>C33A          | -                               | ↓ HPV E6 oncoproteins<br>↑p53, Cell cycle arrest at G2/M, Cell growth arrest                                                                                                                     | [43]       |

| Compound                                             | Dietary Sources                                                                                                                       |          | Model                                                                      | IC50                                  | Mechanism of Action                                                                                                                                                                                                                      | References |
|------------------------------------------------------|---------------------------------------------------------------------------------------------------------------------------------------|----------|----------------------------------------------------------------------------|---------------------------------------|------------------------------------------------------------------------------------------------------------------------------------------------------------------------------------------------------------------------------------------|------------|
| Hesperidin<br>(Hesperetin-7-O-rutinoside)            |                                                                                                                                       | In vivo  | Xenograft mice, rats                                                       | -                                     | ↓ DNMT, HDAC, Cell proliferation<br>↑ Apoptosis, ER stress, Glucose uptake, ASK1/JNK pathway, ROS                                                                                                                                        |            |
| Isoliquiritigenin<br>(Polyphenols, Isoflavonoids)    | <i>Glycyrrhiza inflata</i> and<br><i>Glycyrrhiza radix</i>                                                                            | In vitro | HeLa<br>CaSki, SiHa, C33A                                                  | 39.9 – 53.76 –<br>58.10 – 32.83<br>μM | ↓ Bcl-2, HPV E6 oncoprotein, p-p53, cdc25C, cdc2, Cyclin A, Cyclin B<br>↑ Apoptosis, Cell cycle arrest at G2/M, Caspase-3, Caspase-8, Cleavage of caspase-9, Caspase-12, PARP, Bax, p53, p21, Cytochrome c, p-eIF2α, GRP78 level, p-Chk2 | [212,213]  |
| Isorhamnetin<br>(Polyphenols, Flavonoids, Flavonols) | <i>Ginkgo biloba</i> , <i>Persicaria thunbergii</i> , <i>Oenanthe javanica</i> , and <i>Hippophae rhamnoides</i>                      | In vitro | HeLa                                                                       | 100 μM                                | ↓ Proliferation, Telomerase activity, Cdc25C, Cdc2, Cyclin B1<br>↑ Bcl-2, AMT-Chk2 pathway,<br>Cell cycle arrest at G2/M, Bax, Apoptosis, p-Cdc25C, p-Cdc2                                                                               | [214–217]  |
| Jaceosidin<br>(Polyphenols, Flavonoids, Flavones)    | Compositae                                                                                                                            | In vitro | SiHa<br>CaSki                                                              | -                                     | ↓ E6 and E7 functions (impairment of binding to p53 and pRb)<br>↑ caspase-3, caspase-9                                                                                                                                                   | [59,60]    |
| Juglone<br>(Polyphenols, Naphtoquinones)             | <i>Juglans mandshurica</i>                                                                                                            | In vitro | HeLa, CaSki, C33A                                                          | -                                     | ↓ Cell viability, Proliferation, Cell migration, Invasion<br>↑ Cell cycle arrest at G2/M, Morphological changes, Apoptosis, Cytochrome c, Caspase-3, PARP, p-JNK, p-c-Jun                                                                | [218,219]  |
| Kaempferol<br>(Polyphenols, Flavonoids, Flavonols)   | Onions, oranges, and parsley                                                                                                          | In vitro | HeLa, SiHa, CaSki, C33A, HaCaT                                             | -                                     | ↓ Proliferation, Cyclin B1, CDK1, NF-κB nuclear translocation, Bcl-2, Bax<br>↑ Cell cycle arrest at G2/M                                                                                                                                 | [73,74]    |
| Luteolin<br>(Polyphenols, Flavonoids, Flavones)      | Celery, broccoli, green pepper, parsley, thyme, perilla, chamomile tea, carrots, olive oil, peppermint, rosemary, oranges and oregano | In vitro | CaSki, E6/E7 immortalized human foreskin keratinocytes (HFK), primary HFKs | 23 μM                                 | ↓ E6 oncoprotein function (through binding mimicking leucines in the α-helical motif of E6AP)                                                                                                                                            | [61]       |
|                                                      |                                                                                                                                       | In vivo  | HeLa                                                                       | -                                     | ↑ Apoptosis (TRAIL-induced)                                                                                                                                                                                                              |            |
| Methylenedioxy lignan<br>(Polyphenols, Lignans)      | <i>Phyllanthus urinaria</i>                                                                                                           | In vitro | HeLa                                                                       | 4.46 μM                               | ↓ Cell proliferation, telomerase activity<br>↑ Apoptosis                                                                                                                                                                                 | [88]       |
| Morin<br>(Polyphenols, Flavonoids, Flavonols)        | White mulberry, osage orange, apple guava, old fustic, strawberry, almond hull, figs, sweet chestnut, onions, jack fruit, red wine    | In vitro | HeLa                                                                       | 214.28 μM                             | ↓ Binding of HPV E6 oncoprotein to FADD and caspase-8, Proliferation, CDK1, Cdc25C, Survivin, Cyclin B1, CHK2, Bcl-2, Bcl-xL, AMPK, cIAP-1, cIAP-2, PKCε, and NF-κβ mRNA expression                                                      | [220,221]  |

| Compound                                                                                | Dietary Sources                                                                                                                                                              |          | Model                | IC50     | Mechanism of Action                                                                                                                                                                                                                                                                                                                                   | References |
|-----------------------------------------------------------------------------------------|------------------------------------------------------------------------------------------------------------------------------------------------------------------------------|----------|----------------------|----------|-------------------------------------------------------------------------------------------------------------------------------------------------------------------------------------------------------------------------------------------------------------------------------------------------------------------------------------------------------|------------|
|                                                                                         |                                                                                                                                                                              |          |                      |          | ↑ Morphological changes, Cell cycle arrest at G2/M, p53, p21, Wee 1, Apoptosis, Death receptors pathway related genes mRNA expression, Bax, Bad, cytochrome c, Apaf-1, and caspases-9 genes mRNA expression, PI3K, AKT, mTOR, P70S6K, and Smac genes mRNA expression, ROS                                                                             |            |
| Myricetin<br>(Polyphenols, Flavonoids, Flavonols)                                       | Cranberry, dock, sweet potato leaves, chard, swiss, broad beans (immature seeds), rutabagas, garlic, blueberry, peppers (hot chili, green) blackberry, lotus root, and lemon | In vitro | HeLa                 | 100 µM   | LDH release<br>↓ Mitochondrial membrane potentials, Caspase-3<br>↑ Apoptosis, Cell cycle arrest at G0/G1                                                                                                                                                                                                                                              | [222–224]  |
| Naringenin and naringenin-loaded nanoparticles<br>(Polyphenols, Flavonoids, Flavanones) | Grapefruit and citrus fruits                                                                                                                                                 | In vitro | SiHa, HeLa           | 750 µM   | ↓ Proliferation, Caspase-1, NF-κB p65 subunit, COX-2<br>↑ Apoptosis through both death-receptor and mitochondrial pathways, Cell cycle arrest at G2/M, Caspase-3, Caspase-9, p53, Bax, Fas, FADD<br>↑ Cytotoxicity (dose-dependent), ROS, lipid peroxidation<br>↓ Intracellular glutathione levels<br>Alterations in mitochondrial membrane potential | [44–49]    |
| Nor-dihydro-guaiaretic acid<br>(Polyphenols, Lignans)                                   | <i>Larrea tridentata</i>                                                                                                                                                     | In vitro | SiHa                 | 4.46 µM  | ↓ HPV E6 and E7 transcription and expression<br>↑ Apoptosis                                                                                                                                                                                                                                                                                           | [89]       |
| Paeonol<br>(Polyphenols, Hydroxybenzoketones)                                           | <i>Cynanchum paniculatum</i> , and <i>Paeonia suffruticosa</i>                                                                                                               | In vitro | HeLa                 | -        | ↓ Cell migration, Invasion, 5-lipoxygenase, Proliferation, PI3K/AKT signaling pathway<br>↑ Apoptosis, Morphological changes, ROS, Cytochrome c, Bax/Bcl-2 ratio, Caspase-3                                                                                                                                                                            | [225,226]  |
| Peonidin<br>(Polyphenols, Flavonoids, Anthocyanidins)                                   | Berries, red fruits, cereals, root vegetables                                                                                                                                | In vitro | HeLa                 | 85.95 µM | ↓ Proliferation<br>↑ ROS, Peroxides                                                                                                                                                                                                                                                                                                                   | [205]      |
| Phloretin<br>(Polyphenols, Chalcones)                                                   | Fruit, leaves, and roots of apple tree                                                                                                                                       | In vitro | HeLa, CaSki, SiHa    | -        | ↓ Cell viability, Cell migration, Invasion, Colony-forming capacity, Cathepsin S, MMP-2, MMP-3, Self-renewal ability, ALDH1 activity, Protease activities of cervical cancer-initiating cells<br>↓ Lung colonization, Tumor growth, Angiogenesis                                                                                                      | [227]      |
|                                                                                         |                                                                                                                                                                              | In vivo  | SiHa xenograft mouse | -        |                                                                                                                                                                                                                                                                                                                                                       |            |
| Pterostilbene<br>(Polyphenols, Stilbenes)                                               | Grapes, blueberries, red wine, peanuts, and some medicinal plants                                                                                                            | In vitro | HeLa, PC1            | 15.61 µM | ↓ HPV E6 Oncoprotein in vivo and in vitro, VEGF Protein in vivo<br>↑ Tumor development by cell cycle arrest and ↓ tumor growth<br>↑ Cleaved Caspase-3                                                                                                                                                                                                 | [228,229]  |
|                                                                                         |                                                                                                                                                                              | In vivo  | HPV E6 Mice          | -        |                                                                                                                                                                                                                                                                                                                                                       |            |

| Compound                                                   | Dietary Sources                                                                                     |          | Model                      | IC50       | Mechanism of Action                                                                                                                                                                                                                                                       | References |
|------------------------------------------------------------|-----------------------------------------------------------------------------------------------------|----------|----------------------------|------------|---------------------------------------------------------------------------------------------------------------------------------------------------------------------------------------------------------------------------------------------------------------------------|------------|
| Puerarin<br>(Polyphenols,<br>Isoflavonoids)                | <i>Pueraria lobata</i> ,<br><i>Pueraria thomsonii</i> and<br><i>Pueraria tuberosa</i>               | In vitro | HeLa                       | -          | ↓ Cell proliferation, P13K, p-Akt, p-mTOR<br>↑ Apoptosis                                                                                                                                                                                                                  | [230]      |
| Punicalagin<br>(Polyphenols,<br>Hydroxybenzoic<br>acids)   | <i>Punica granatum</i>                                                                              | In vitro | HeLa, ME-180               | -          | Modulating MMP-2, MMP-9, TIMP-2, and TIMP-3<br>↓ Cell viability, Bcl-2, Cell migration, β-catenin signaling<br>pathway, Mitochondrial membrane potential<br>↑ ROS, Apoptosis, Bax, Caspase-3, Caspase-9, p53                                                              | [231]      |
| Quercetin<br>(Polyphenols,<br>Flavonoids,<br>Flavonols)    | Onion, kale, leek, broccoli,<br>buckwheat, red grapes, tea, and<br>apples                           | In vitro | HeLa                       | 110 μM     | - Restores TSG expression fold change<br>↓ DNMTs, HDAC, HMT H3K9, 5'CpG promoter methylation of<br>TSGs, Apoptosis, ROS, Cell cycle arrest at G2/M                                                                                                                        | [75–77]    |
| Resveratrol<br>(Polyphenols,<br>Stilbenes)                 | Red wine, grapes, and berries                                                                       | In vitro | SiHa, HeLa, C33A,<br>CaSki | 150-250 μM | ↓ Proliferation, Invasion and migration by either inactivating<br>phosphorylation of STAT3Tyr705 or ROS generation, HPV E6<br>oncoprotein, PCNA protein in vivo, VEGF protein in vivo<br>↑ Apoptosis, Autophagy, Fis1 and Deo1, ER stress, MiR-<br>326/pyruvate kinase M2 | [91–94]    |
|                                                            |                                                                                                     | In vivo  | Xenograft Mice             | -          |                                                                                                                                                                                                                                                                           |            |
| Rutin<br>(Polyphenols,<br>Flavonoid<br>glycosides)         | Asparagus, buckwheat, apricots,<br>apples, cherries, grapes, grapefruit,<br>plums, oranges, and tea | In vitro | HeLa                       | 30 μg/mL   | ↓ Proliferation, Tumor growth                                                                                                                                                                                                                                             | [147]      |
|                                                            |                                                                                                     | In vivo  | K14-HPV-16 mice            | -          | ↓ COX-2, Leukocytic infiltration in lesions                                                                                                                                                                                                                               |            |
| Salvianolic Acid B<br>(Polyphenols)                        | <i>Salvia miltiorrhiza</i>                                                                          | In vitro | HeLa                       | -          | ↓ Cell viability, TNF levels<br>↑ Apoptosis                                                                                                                                                                                                                               | [232,233]  |
| Scopoletin<br>(Polyphenols,<br>Hydroxycoumarins)           | <i>Scopolia spp.</i>                                                                                | In vitro | HeLa, SiHa, C33A,<br>DoTc2 | 90 μM      | ↓ PI3K/AKT signaling pathway, Cell migration<br>↑ Cell growth arrest, Caspase-3, Caspase-8, Caspase-9,<br>Apoptosis, DNA damages, Cell cycle arrest at G2/M                                                                                                               | [234]      |
| Sesamin<br>(Polyphenols,<br>Lignans)                       | Sesame oil                                                                                          | In vitro | HeLa                       | -          | ↓ Cell proliferation/migration<br>↑ Apoptosis (ER stress-mediated, through IRE1α/JNK)<br>Autophagy                                                                                                                                                                        | [90]       |
| Silibinin<br>(Polyphenols,<br>Flavonoids,<br>Flavolignans) | milk thistle ( <i>Silybum marianum</i> )                                                            | In vivo  | HeLa                       | -          | G2 arrest<br>↑ Apoptosis (dose- and time-dependent)                                                                                                                                                                                                                       | [86,87]    |
| Wogonin                                                    | <i>Scutellaria baicalensis</i>                                                                      | In vitro | SiHa, CaSki                | -          | ↑ Apoptosis, p53 and pRb<br>↓ E6 and E7                                                                                                                                                                                                                                   | [62,63]    |

| Compound                                                                                        | Dietary Sources                                          | Model    | IC50                                                      | Mechanism of Action | References                                                                                                                                                                                                                                                                         |           |
|-------------------------------------------------------------------------------------------------|----------------------------------------------------------|----------|-----------------------------------------------------------|---------------------|------------------------------------------------------------------------------------------------------------------------------------------------------------------------------------------------------------------------------------------------------------------------------------|-----------|
| (Polyphenols, Flavonoids, Flavones)                                                             |                                                          |          |                                                           |                     |                                                                                                                                                                                                                                                                                    |           |
| Xanthohumol (Polyphenols, Flavonoids)                                                           | <i>Humulus lupulus</i>                                   | In vitro | CaSki<br>HeLa                                             | 9.4 μM              | ↓ Bcl-2, XIAP, Cell proliferation, Mitochondrial membrane potential<br>↑ Cell cycle arrest at S, Caspase-3, Caspase-8, Caspase-9, PARP, p53, AIF, Apoptosis by both extrinsic and intrinsic apoptotic pathways, DNA fragmentations, Morphological changes, TRAIL-R2 protein levels | [235,236] |
| Alpha-carotene, beta-carotene, lutein, zeaxanthin and alpha-tocopherol (Terpenoids Carotenoids) | Carrot, kale, pumpkin, sweet potato                      | In vivo  | Clinical trial on single-compounds or combination thereof | -                   | ↓ risk of cervical cancer                                                                                                                                                                                                                                                          | [112]     |
| Carnosic acid (Terpenoids, Diterpenoids)                                                        | Chinese medicinal herbs                                  | In vitro | CaSki<br>SiHa                                             | -                   | ↓ Proliferation<br>↑ Cell growth arrest, Apoptosis, Caspase-3, Caspase-9, Cell cycle arrest at G2/M, ROS                                                                                                                                                                           | [237]     |
|                                                                                                 |                                                          | In vivo  | CaSki xenograft, mouse                                    | -                   | ↓ Tumor growth                                                                                                                                                                                                                                                                     |           |
| Lycopene (Terpenoids, Carotenoids)                                                              | Tomato, watermelon, pink grapefruit, guava, papaia       | In vitro | HeLa                                                      | -                   | ↑ cells sensitivity to cisplatin<br>↓ viability<br>↑ Bax and Nrf2 expression<br>↓ Bcl-2 expression, NF-κB signaling path-way.                                                                                                                                                      | [113–115] |
| Saikasaponins (Terpenoids, Triterpens)                                                          | <i>Bupleurum falcatum</i>                                | In vitro | HeLa, SiHa                                                | -                   | ↑ sensitization to cisplatin (intracellular ROS accumulation)                                                                                                                                                                                                                      | [116,117] |
| Saponins (Terpenoids, Triterpens)                                                               | Chickpeas, soya beans, Chinese herbs                     | In vitro | HeLa                                                      | 2.62 μM             | ↑ Apoptosis (cleaved Caspase-3 , Caspase-9, Bax/Bcl-2)                                                                                                                                                                                                                             | [118]     |
| Tanshinone IIA (Terpenoids, Diterpenoids)                                                       | <i>Salvia spp.</i>                                       | In vitro | HeLa, SiHa, CaSki, C33A                                   | -                   | ↓ Cell growth, HPV E6 and E7 expression<br>↑ Apoptosis, cell cycle arrest                                                                                                                                                                                                          | [119]     |
| Ursolic acid (Terpenoids. Triterpenoids)                                                        | Apples, cranberries, peppermint, prunes, oregano, thyme. | In vitro | CaSki, HeLa, C4-1, SiHa                                   | -                   | ↓ Cell proliferation, invation and migration (Caspases- and p53-mediated)<br>↓ Anti-apoptosis-related signals<br>↑ Apoptosis, expression of C/EBP homologous protein and glucose-regulated protein 78                                                                              | [120,121] |

| Compound                                                                 | Dietary Sources                                                                  |          | Model                                                 | IC50 | Mechanism of Action                                                                                                                                                                         | References |
|--------------------------------------------------------------------------|----------------------------------------------------------------------------------|----------|-------------------------------------------------------|------|---------------------------------------------------------------------------------------------------------------------------------------------------------------------------------------------|------------|
|                                                                          |                                                                                  | In vivo  | CaSki, HeLa, SiHa xenografts                          | -    | ↓ Tumor size                                                                                                                                                                                |            |
| Allicin<br>(Thiols - Allylic sulfides)                                   | Garlic and onion                                                                 | In vitro | SiHa                                                  | -    | ↑ apoptosis (inhibition of NRF2)                                                                                                                                                            | [122]      |
| Indole-3-carbinol (I3C) and DIM, a stable form of I3C (Thiols – Indoles) | Broccoli and Brussels sprouts                                                    | In vitro | C33A                                                  | -    | - Selective apoptosis induction                                                                                                                                                             | [123,129]  |
|                                                                          |                                                                                  | In vivo  | 17-beta-estradiol (E2)-treated mice                   | -    | ↓ estradiol anti-apoptotic effect                                                                                                                                                           |            |
|                                                                          |                                                                                  | In vivo  | Randomized, double-blind, multi-center clinical trial | -    | ↓ CIN lesions (100% at 200 mg/day; 90.5% at 100 mg/day)                                                                                                                                     |            |
| Sulforaphane (Thiols, Glucosinolates)                                    | Asparagus, broccoli, Brussel sprouts, cauliflower, horse-radish, mustard, radish | In vitro | HeLa, Cx and CxWJ                                     | -    | Cytotoxicity<br>G2/M phase arrest (dose-dependent, Cyclin B1 down-regulation)                                                                                                               | [130,131]  |
| Berberine (Alkaloids)                                                    | <i>Berberis genus</i>                                                            | In vitro | HeLa, SiHa                                            | -    | ↓ Cell growth, HPV E6 and E7 expression, telomerase activity<br>↑ Apoptosis, cell cycle arrest, p53, pRB<br>Epigenetic modifications and disruption of microtubule network by p53 targeting | [132,133]  |
| Betaines                                                                 | Beetroot                                                                         | In vitro | HeLa                                                  | -    | ↓ proliferation<br>G1/S or S/G2 cell cycle arrest<br>↑ Dose-dependent apoptosis (Bax, p53, caspase-3 and Bcl-2)                                                                             | [134]      |
| Piperine (1-pipecoylpiperidine)                                          | <i>Piper nigrum, Piper longum</i>                                                | In vitro | HeLa                                                  | -    | ↑ Dose-dependent apoptosis (caspase-3, loss of MMP, DNA fragmentation and ROS increase)                                                                                                     | [136]      |
| Withaferin A (Steroid lactone)                                           | <i>Withania somnifera</i>                                                        | In vitro | CaSki                                                 | -    | ↓ HPV E6 and E7 expression<br>↑ Apoptosis                                                                                                                                                   | [137]      |
| Lectins                                                                  | <i>Astragalus mongholicus</i>                                                    | In vitro | HeLa                                                  | -    | ↓ Cell proliferation (↑ p21 and p27, ↓ active complex cyclin E/CDK2 kinase)<br>↑ Apoptosis                                                                                                  | [139]      |
| Peptides                                                                 | <i>Triticum aestivum, Abrus precatorius, Trichosanthes kirilowii</i>             | In vitro | HeLa                                                  | -    | ↓ Cell proliferation (↑ DNA damage, G2 arrest, ↓ CDK1-cyclin B1 complex, ↑ active chk1 kinase)<br>↑ Apoptosis (↑ ROS, ↓ Bcl-2/Bax ratio, ↑ mitochondrial permeability)                      | [140–142]  |

| Compound        | Dietary Sources       |                            | Model | IC50                   | Mechanism of Action                                                             | References |
|-----------------|-----------------------|----------------------------|-------|------------------------|---------------------------------------------------------------------------------|------------|
| Polysaccharides | <i>Solanum nigrum</i> | In vitro<br>and in<br>vivo | U14   | from 19 to 60<br>μg/ml | ↓ Tumor growth (CD4+/CD8+ ratio modification)<br>↑ Apoptosis (TRAIL expression) | [238]      |
